# Supplementary material for: Utilizing non-stoichiometry in Nd2Zr2O7pyrochlore: exploring superior ionic conductors
Source: Royal Society of Chemistry journal article supplement (doi:10.1039/c6ra08722a), 2016-01-01
Supplement: c6ra08722a1.pdf [file c6ra08722a1.pdf]

## Supplementary information

# Utilizing non-stoichiometry in $\text{Nd}_2\text{Zr}_2\text{O}_7$ pyrochlore: Exploring superior ionic conductors

P. Anithakumari<sup>1</sup>, V. Grover<sup>1\*</sup>, C. Nandi<sup>2</sup>, K. Bhattacharyya<sup>1</sup> and A. K. Tyagi<sup>1</sup>

<sup>1</sup>Chemistry Division, Bhabha Atomic Research Centre, Mumbai- 400085, India

<sup>2</sup>Radio Metallurgy Division, Bhabha Atomic Research Centre, Mumbai- 400085, India

**Fig. 1** The Nd 4p XPS spectra recorded for the nominal compositions  $\text{Nd}_{1.6}\text{Zr}_{2.4}\text{O}_{7.2}$  and  $\text{Nd}_{1.8}\text{Zr}_{2.2}\text{O}_{7.1}$

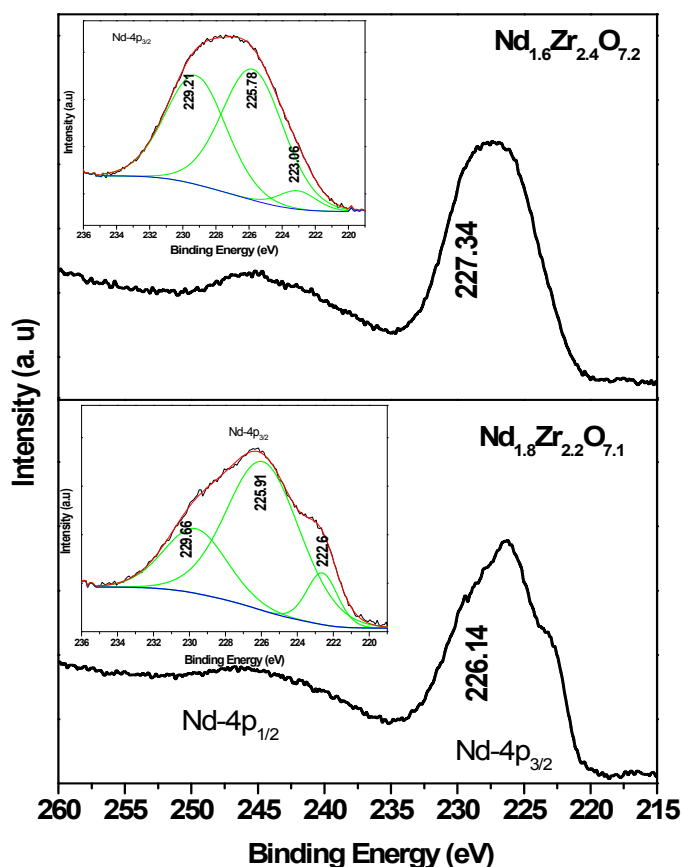

**Table 1: The data obtained after deconvolution of Nd 4p<sub>3/2</sub> peak for the two nominal compositions Nd<sub>1.6</sub>Zr<sub>2.4</sub>O<sub>7.2</sub> and Nd<sub>1.8</sub>Zr<sub>2.2</sub>O<sub>7.1</sub>**

|         |        |        |        |                                                        |
|---------|--------|--------|--------|--------------------------------------------------------|
| Peak    | 223.06 | 225.78 | 229.21 | <b>Nd<sub>1.6</sub>Zr<sub>2.4</sub>O<sub>7.2</sub></b> |
| FWHM    | 2.67   | 4.39   | 4.29   |                                                        |
| Area    | 17002  | 198150 | 161043 |                                                        |
| Area(%) | 4.52   | 52.66  | 42.83  |                                                        |
| Peak    | 222.61 | 225.91 | 229.66 | <b>Nd<sub>1.8</sub>Zr<sub>2.2</sub>O<sub>7.1</sub></b> |
| FWHM    | 2.02   | 4.79   | 4.11   |                                                        |
| Area    | 34998  | 239551 | 89161  |                                                        |
| Area(%) | 9.62   | 65.86  | 24.53  |                                                        |

**Fig. 2. The Zr 3p XPS spectra recorded for the nominal compositions Nd<sub>1.6</sub>Zr<sub>2.4</sub>O<sub>7.2</sub> and Nd<sub>1.8</sub>Zr<sub>2.2</sub>O<sub>7.1</sub>**

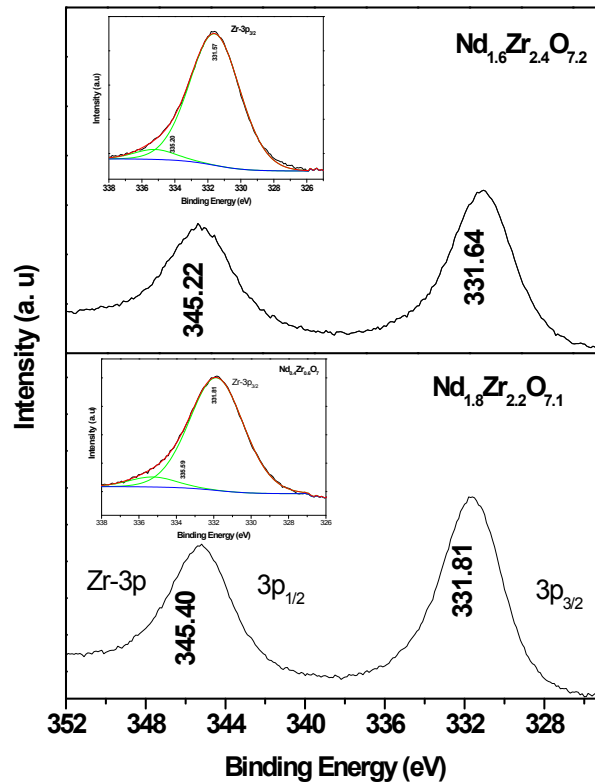

**Table 2: The data obtained after deconvolution of Zr 3p<sub>3/2</sub> peak for the two nominal compositions Nd<sub>1.6</sub>Zr<sub>2.4</sub>O<sub>7.2</sub> and Nd<sub>1.8</sub>Zr<sub>2.2</sub>O<sub>7.1</sub>**

|         |        |        |                                                        |
|---------|--------|--------|--------------------------------------------------------|
| Peak    | 331.56 | 334.48 | <b>Nd<sub>1.6</sub>Zr<sub>2.4</sub>O<sub>7.2</sub></b> |
| FWHM    | 3.44   | 2.64   |                                                        |
| Area    | 649812 | 37448  |                                                        |
| Area(%) | 94.55  | 5.45   |                                                        |
| Peak    | 331.85 | 335.25 | <b>Nd<sub>1.8</sub>Zr<sub>2.2</sub>O<sub>7.1</sub></b> |
| FWHM    | 3.45   | 2.87   |                                                        |
| Area    | 439713 | 340645 |                                                        |
| Area(%) | 92.81  | 7.19   |                                                        |

**Fig. 1** represents XPS spectrum of the Nd 4p<sub>1/2</sub> and 4p<sub>3/2</sub> and the inset shows the respective deconvoluted spectrum of the Nd 4p<sub>3/2</sub> peak for the two nominal compositions Nd<sub>1.6</sub>Zr<sub>2.4</sub>O<sub>7.2</sub> and Nd<sub>1.8</sub>Zr<sub>2.2</sub>O<sub>7.1</sub>. Three peaks at 223.1, 225.8 and 229.2 eV could be obtained upon deconvolution of Nd 4p<sub>3/2</sub> peaks. The quantitative data associated with these peaks determined using the CASA software is also presented in the **Table 1**. These being Nd<sup>3+</sup>-deficient compositions, three types of environments for Nd<sup>3+</sup> are expected. Vacant A (Nd<sup>3+</sup>) -sites, normal Nd<sup>3+</sup> pyrochlore sites and Nd<sup>3+</sup> in vicinity of Zr<sup>4+</sup>. Due to higher electron density at Nd<sup>3+</sup> in vicinity of vacancy, the least binding energy would represent the Nd<sup>3+</sup>- vacancy states. The other two would be Nd<sup>3+</sup> in A-site in pyrochlore lattice and the other where in the lattice sites Nd<sup>3+</sup> are replaced by the Zr<sup>4+</sup>. The Nd<sup>3+</sup> ions in the vicinity of Zr<sup>4+</sup> will experience lesser electron density and hence should possess higher binding energy. Thus, the component at 229.2 eV represents Nd<sup>3+</sup> in Zr<sup>4+</sup> vicinity and the component at 225.8 eV should correspond to the Nd in the usual A-site in pyrochlores. The great prevalence of disorder would imply greater fraction of the component at 229.2 eV. It is obvious from Fig. 1 that the nominal composition Nd<sub>1.6</sub>Zr<sub>2.4</sub>O<sub>7.2</sub> possess greater fraction of Nd<sup>3+</sup> in vicinity of Zr<sup>4+</sup> in similar environment implying it has higher disorder. Further, if the extent of order has to increase from Nd<sub>1.6</sub>Zr<sub>2.4</sub>O<sub>7.2</sub> to Nd<sub>1.8</sub>Zr<sub>2.2</sub>O<sub>7.1</sub>, there should be an increase in average co-ordination number of Nd<sup>3+</sup> which should manifest in lower average binding energy. As is obvious from the figure that average binding energy decreases on proceeding from the nominal composition Nd<sub>1.6</sub>Zr<sub>2.4</sub>O<sub>7.2</sub> to Nd<sub>1.8</sub>Zr<sub>2.2</sub>O<sub>7.1</sub> thus supporting greater order in latter.

Similarly, **Fig. 2** depicts Zr -3p XPS peaks and the inset shows the deconvoluted 3-p<sub>3/2</sub> peak for the two nominal compositions. The respective data obtained after deconvolution and fitting are shown **Table 2**. We must state that not much is evident from the XPS data on Zr except that a slight increase in average B.E. indicates towards decrease in average co-ordination number of Zr on proceeding from Nd<sub>1.6</sub>Zr<sub>2.4</sub>O<sub>7.2</sub> to Nd<sub>1.8</sub>Zr<sub>2.2</sub>O<sub>7.1</sub>. This is in accordance in increase in order of system. An increase in order would try to increase the amount of Zr in 6-fold co-ordination.
